# Supplementary material
Source: PubMed Central journal article supplement (PMC6698159)
Supplement: NIHMS1045139-supplement-Supplementary_file_1.pdf [file NIHMS1045139-supplement-Supplementary_file_1.pdf]

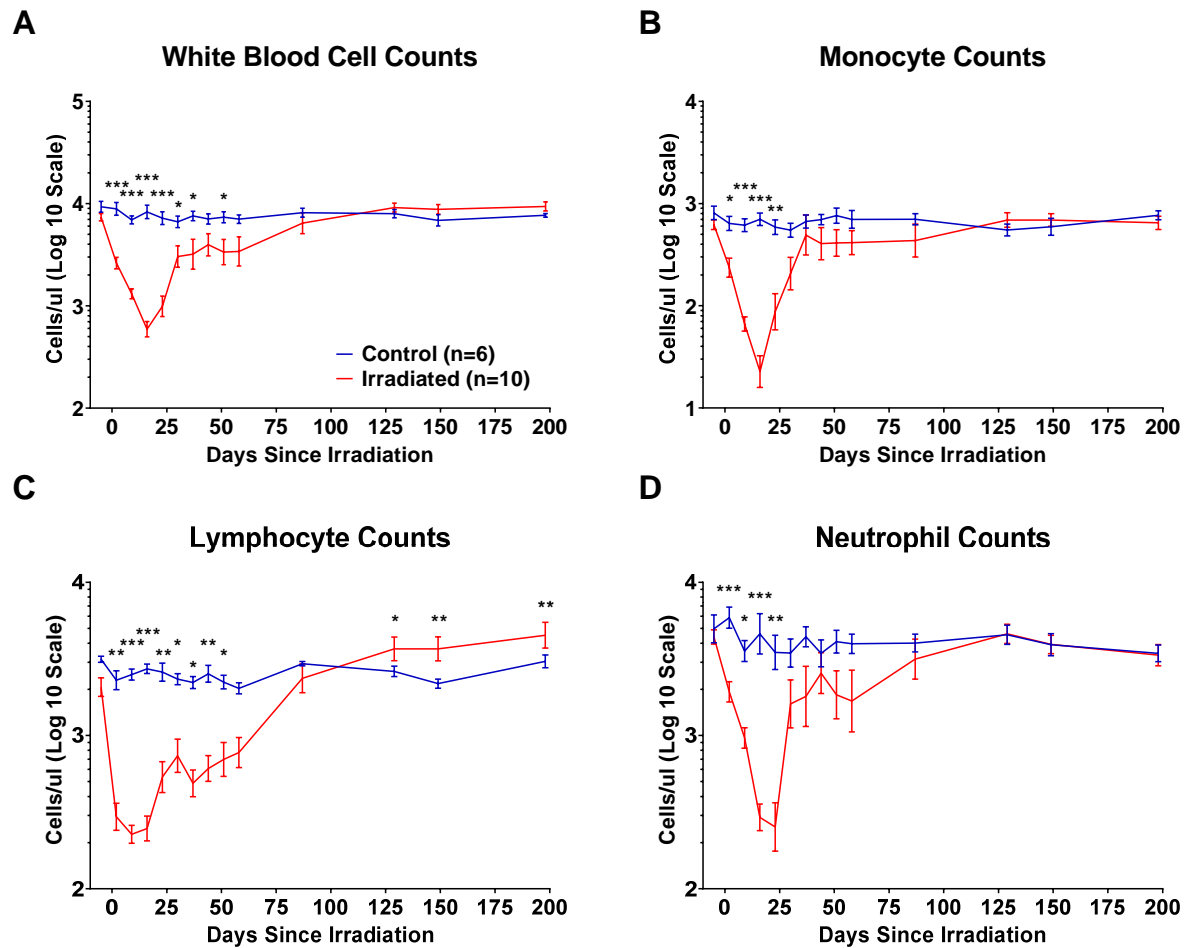

**FIG. S1. Peripheral Immune Cell Recovery after Total-Body Irradiation (Log Scale).** Total white blood cell (A), monocyte (B), lymphocyte (C), and neutrophil (D) counts were all acutely depleted by TBI. Monocytes and neutrophils recovered by 30 days post-irradiation while total white blood cells and lymphocytes remained significantly decreased until days 51 and 58 post-irradiation respectively. After recovery, total white blood cells, monocytes, and neutrophils in IRR animals did not differ from CTL but lymphocytes increased above CTL animals at 129 days post irradiation and remained elevated thereafter. \* $p < 0.05$ , \*\* $p < 0.01$ , \*\*\* $p < 0.001$
